# Supplementary material for: Evaluation of Coatings to Improve the Durability and Water-Barrier Properties of Corrugated Cardboard
Source: MDPI journal article supplement (doi:10.3390/coatings12010010), 2021-12-23
Supplement: s1 [file s1]

Article

# Evaluation of Coatings to Improve the Durability and Water-Barrier Properties of Corrugated Cardboard

Andrea Marinelli <sup>1,2</sup>, Maria Vittoria Diamanti <sup>1,2,\*</sup>, Andrea Lucotti <sup>1</sup>, MariaPia Pedferri <sup>1,2</sup> and Barbara Del Curto <sup>1,2</sup>

<sup>1</sup> Department of Chemistry, Materials and Chemical Engineering “Giulio Natta”, Politecnico di Milano, Piazza Leonardo Da Vinci 31, 20133 Milan (MI), Italy; andrea.marinelli@polimi.it (A.M.); andrea.lucotti@polimi.it (A.L.); mariapia.pedferri@polimi.it (M.P.); barbara.delcurto@polimi.it (B.D.C.)

<sup>2</sup> National Interuniversity Consortium of Materials Science and Technology (INSTM), Via Giuseppe Giusti 9, 50121 Firenze (FI), Italy

\* Correspondence: mariavittoria.diamanti@polimi.it; Tel. +39-0223993137

## Supplementary material

The results of the FTIR analysis for T-POL and K-POL are reported in Figure S1 and Figure S2, respectively.

**Citation:** Marinelli, A.; Diamanti, M.V.; Lucotti, A.; Pedferri, M.; Curto, B.D. Evaluation of Coatings to Improve the Durability and Water-Barrier Properties of Corrugated Cardboard. *Coatings* **2022**, *12*, 10. <https://doi.org/10.3390/coatings12010010>

Academic Editor: Douglas W. Bousfield

Received: 19 November 2021

Accepted: 18 December 2021

Published: 23 December 2021

**Publisher’s Note:** MDPI stays neutral with regard to jurisdictional claims in published maps and institutional affiliations.

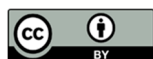

**Copyright:** © 2021 by the authors. Submitted for possible open access publication under the terms and conditions of the Creative Commons Attribution (CC BY) license (<https://creativecommons.org/licenses/by/4.0/>).

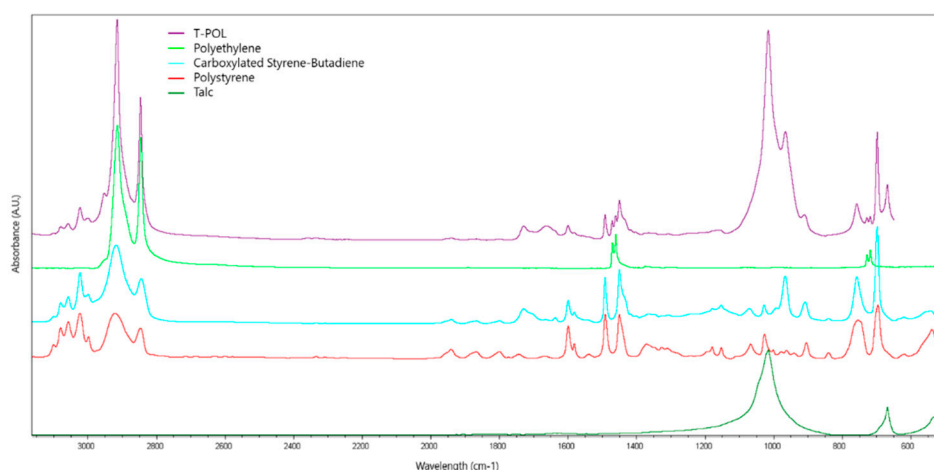

**Figure S1.** FTIR analysis of T-POL and its constituents.

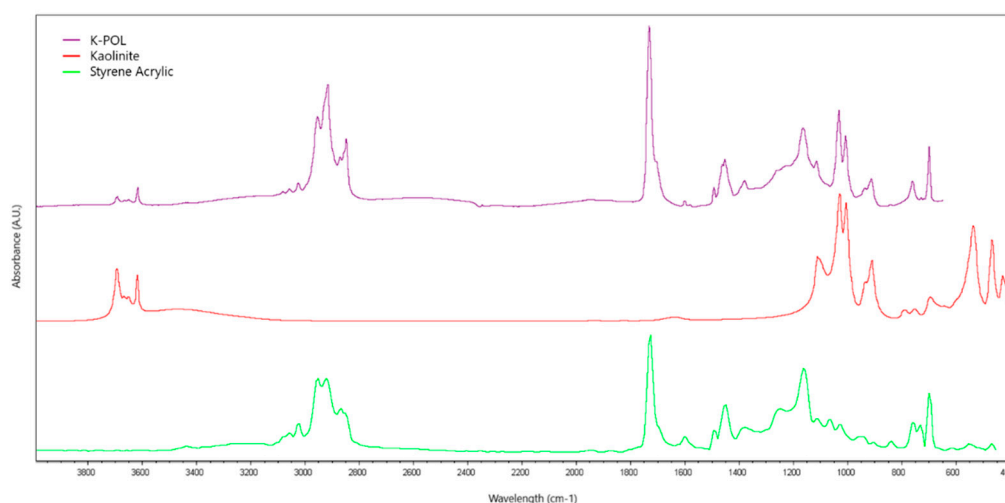

**Figure S2.** FTIR analysis of K-POL and its constituents.
